# Supplementary material for: Dynamic of Circulating DNAM-1+ Monocytes and NK Cells in Patients with STEMI Following Primary Percutaneous Coronary Intervention
Source: MDPI journal article supplement (doi:10.3390/jcdd9110395), 2022-11-15
Supplement: s1 [file s1]

**Supplementary Table S1.** Correlation between left ventricular ejection fraction values and DNAM-1+ subset of monocytes and NK cells in different time points following the primary PCI in patients with STEMI.

|                                                                                                                                                  | Cell Population                                   | r—Correlation Coefficient | <i>p</i> * |
|--------------------------------------------------------------------------------------------------------------------------------------------------|---------------------------------------------------|---------------------------|------------|
| At admission                                                                                                                                     | CD16++DNAM-1+ monocytes, <i>total count</i>       | 0.018                     | 0.907      |
|                                                                                                                                                  | CD14++DNAM-1+ monocytes, <i>total count</i>       | 0.282                     | 0.057      |
|                                                                                                                                                  | CD56dimCD16++DNAM-1+ NK cells, <i>total count</i> | −0.100                    | 0.509      |
| 3h after primary PCI                                                                                                                             | CD16++DNAM-1+ monocytes, <i>total count</i>       | 0.163                     | 0.280      |
|                                                                                                                                                  | CD14++DNAM-1+ monocytes, <i>total count</i>       | 0.261                     | 0.080      |
|                                                                                                                                                  | CD56dimCD16++DNAM-1+ NK cells, <i>total count</i> | 0.146                     | 0.334      |
| 24 h after primary PCI                                                                                                                           | CD16++DNAM-1+ monocytes, <i>total count</i>       | −0.028                    | 0.019      |
|                                                                                                                                                  | CD14++DNAM-1+ monocytes, <i>total count</i>       | 0.114                     | 0.469      |
|                                                                                                                                                  | CD56dimCD16++DNAM-1+ NK cells, <i>total count</i> | 0.116                     | 0.459      |
| Abbreviations: GMI: Geometric mean intensity; PCI: percutaneous coronary intervention; NK: natural killer. * Spearman rank correlation analysis. |                                                   |                           |            |

**Supplementary Table S2.** Correlation between C-reactive protein and DNAM-1+ subset of monocytes and NK cells at admission in patients with STEMI.

|                                                                                                                   | Cell Population                                   | r—Correlation Coefficient | <i>p</i> * |
|-------------------------------------------------------------------------------------------------------------------|---------------------------------------------------|---------------------------|------------|
|                                                                                                                   | CD16++DNAM-1+ monocytes, <i>total count</i>       | 0.339                     | 0.021      |
|                                                                                                                   | CD14++DNAM-1+ monocytes, <i>total count</i>       | 0.370                     | 0.010      |
|                                                                                                                   | CD56dimCD16++DNAM-1+ NK cells, <i>total count</i> | −0.144                    | 0.334      |
| Abbreviations: PCI: percutaneous coronary intervention; NK: natural killer. * Spearman rank correlation analysis. |                                                   |                           |            |
